1 **A peptide of a type I toxin-antitoxin system induces *Helicobacter pylori* morphological**  
2 **transformation from spiral-shape to coccoids**

3

4 **Short title: *H. pylori* shape conversion induced by a TA toxin**

5

6 Lamya El Mortaji <sup>1</sup>, Stéphanie Marsin <sup>2+</sup>, Aline Rifflet <sup>3,4</sup>, Ivo G. Boneca <sup>3,4</sup>, J. Pablo

7 Radicella <sup>2</sup>, Gérard Péhau-Arnaudet <sup>5</sup> and Hilde De Reuse <sup>1</sup> \*

8

9 <sup>1</sup> Institut Pasteur, Département de Microbiologie, Unité Pathogénèse de *Helicobacter*, ERL  
10 CNRS 6002, 28 rue du Dr Roux 75724 PARIS Cedex 15 FRANCE.

11 <sup>2</sup> CEA, Institute of Molecular and Cellular Radiobiology, Institut François Jacob, INSERM  
12 UMR967, Universités Paris Diderot et Paris Sud, Fontenay-aux-Roses, France.

13 + Current affiliation: I2BC/UMR 9198 CNRS- CEA -Université Paris Sud, Bat. 430, Orsay,  
14 FRANCE.

15 <sup>3</sup> Institut Pasteur, Département de Microbiologie, Unité Biologie et Génétique de la Paroi  
16 Bactérienne, 75724 PARIS, FRANCE.

17 <sup>4</sup> INSERM, Equipe Avenir, 75015 Paris, France

18 <sup>5</sup> Institut Pasteur, Ultrastructural BioImaging (*UTechS* UBI) /UMR CNRS 3528, PARIS,  
19 FRANCE.

20

21 \* -Corresponding author: Hilde De Reuse (hdereuse@pasteur.fr)

22 Institut Pasteur, Unité Pathogénèse de *Helicobacter*

23 28, rue du Docteur Roux

24 75724 PARIS Cedex 15 FRANCE

25 Tel : +33 1 40 61 36 41

26

## 27 **Summary**

28 Toxin-antitoxin systems are found in many bacterial chromosomes and plasmids with roles  
29 ranging from plasmid stabilization to biofilm formation and persistence. In these systems, the  
30 expression/activity of the toxin is counteracted by an antitoxin, which in type I systems is an  
31 antisense-RNA. While the regulatory mechanisms of these systems are mostly well-defined,  
32 the toxins' biological activity and expression conditions are less understood. Here, these  
33 questions were investigated with a type I toxin-antitoxin system (AapA1-IsoA1) expressed  
34 from the chromosome of the major human pathogen *Helicobacter pylori*. We show that  
35 expression of the AapA1 toxin in *H. pylori* causes growth arrest associated with massive  
36 morphological transformation from spiral-shaped bacteria to round coccoid cells. Coccioids  
37 are observed in patients and during *in vitro* growth as a response to different conditions such  
38 as oxidative stress. The AapA1 toxin, first molecular effector of coccooids to be identified,  
39 targets *H. pylori* inner membrane without disruption, as visualized by Cryo-EM. The  
40 peptidoglycan composition of coccooids is modified as compared to spiral bacteria. No major  
41 changes in membrane potential or ATP concentration result from AapA1 expression,  
42 suggesting coccooid viability. Using single-cell live microscopy, we observed that shape  
43 conversion is associated with cell division interference. Oxidative stress represses antitoxin  
44 promoter activity and enhances processing of its transcript leading to an imbalanced ratio in  
45 favor of AapA1 toxin expression.

46 Our data are in favor of viable coccooids with characteristics of dormant bacteria that might  
47 be important in *H. pylori* infections refractory to treatment.

48

49 **Significance Statement**

50 *Helicobacter pylori*, a gastric pathogen responsible for 800,000 deaths in the world every  
51 year, is encountered, both *in vitro* and in patients, as spiral-shaped bacteria and as round cells  
52 named coccoids. We discovered that the toxin from a chromosomal type I toxin-antitoxin  
53 system is targeting *H. pylori* membrane and acting as an effector of the morphological  
54 conversion of *H. pylori* to coccoids. We showed that these round cells maintain their  
55 membrane integrity and metabolism, strongly suggesting that they are viable dormant bacteria.  
56 Oxidative stress was identified as a signal inducing toxin expression. Our findings reveal new  
57 insights into a form of dormancy of this bacterium that might be associated with *H. pylori*  
58 infections refractory to treatment.

59

60

## 61 **Introduction**

62 Toxin-antitoxin (TA) systems are small genetic elements that are widely distributed on  
63 bacterial mobile genetic elements and among archaeal and bacterial genomes, often in  
64 multiple copies (1-3). They code for a small stable toxic protein, designated toxin, whose  
65 action or expression is counteracted by an unstable antitoxin molecule that can either be an  
66 RNA or a protein (3, 4). Under conditions in which the toxins can act, they target essential  
67 cellular processes or components (transcription, DNA replication, translation, cell wall or  
68 membrane) resulting in growth arrest or cell death (3, 4). The molecular mechanism of the  
69 toxins' activities and their regulation are often known in detail while the biological function  
70 remains elusive. TA systems take part in plasmid maintenance and protection from phage  
71 infection. Less is known on the biological functions and targets of the chromosomally  
72 encoded TA systems. Some are important for bacterial survival in their mammalian host (5)  
73 or biofilm formation (6). There is accumulating evidence that upon stress conditions, some  
74 TA systems play a role in the switch of actively growing bacteria to persisters or dormant  
75 cells (7, 8). Persister bacteria constitute a subpopulation that is metabolically active but slow-  
76 growing and highly tolerant to antibiotics and stress conditions (9). Persistence is considered  
77 as an important cause of recalcitrance of chronic bacterial infections to therapy. However,  
78 stress-induced activation of TA-encoded toxins does not necessarily cause persister formation  
79 (10) and it was more generally found that decreased intracellular ATP concentration is a  
80 landmark of persister formation (11).

81 In the present work, we explored the role of TA systems in *Helicobacter pylori*, a  
82 bacterium that colonizes the stomach of half of the human population worldwide and causes  
83 the development of gastritis. In some cases, gastritis evolves into peptic ulcer disease or  
84 gastric carcinoma that causes about 800,000 deaths in the world every year (12, 13). This  
85 microaerophilic bacterium is unique in its capacity to persistently colonize the stomach  
86 despite its extreme acidity and intense immune response (13). The molecular mechanisms at

87 the origin of this exceptional adaptation capacity of *H. pylori* remain only partially  
88 understood and their elucidation is crucial to understand its virulence and to improve its  
89 eradication in patients with recurrent peptic ulcer disease. *H. pylori* is a Gram-negative  
90 bacterium with a helical shape. Upon stress conditions (antibiotics, aerobic growth) or  
91 prolonged culture, the shape of *H. pylori* progressively evolves into a U-shape followed by a  
92 spherical form designated coccoid (14, 15). *H. pylori* coccoids are non-culturable bacteria  
93 proposed to be dormant forms (15). Recently, dormant non culturable cells were associated  
94 with a deeper state of dormancy when compared to persister cells (16)

95 Coccoids were observed in human gastric biopsies and like spirals adhere to gastric  
96 epithelial cells. Despite numerous reports on coccoid forms of *H. pylori*, no cellular effector  
97 of this conversion has been reported so far.

98 In type I TAs, the antitoxin is a small regulatory RNA inhibiting the synthesis of the toxin  
99 by base pairing the toxin-encoding mRNA (3, 4, 17, 18). Four families (A-B-C-D) of  
100 conserved type I TA systems are expressed from the chromosome of *H. pylori*, only the A  
101 family was studied as it is highly expressed and conserved among *H. pylori* strains (19, 20).  
102 For the A1 TA system, the detailed mechanism by which transcription of the IsoA1 antitoxin  
103 RNA impairs AapA1 toxin synthesis by base-pairing with its primary transcript, ensuring  
104 both translation inhibition of the AapA1 active message and leading to rapid degradation of  
105 the duplex by RNase III has been recently published (20). The *H. pylori* type I toxins are  
106 typically small hydrophobic peptides of 30-40 amino acids predicted to form alpha-helices.  
107 No clues on the mode of action or the physiological role of these systems have been reported.

108 Here we show that the AapA1 toxin induces a rapid and massive morphological  
109 transformation of *H. pylori* from spirals to coccoids by targeting the inner membrane and  
110 interfering with cell division, and that oxidative stress triggers imbalanced expression of the  
111 TA components in favor of toxin production.

## 112 **Results**

113 **The AapA1 toxic peptide, expressed by the AapA1/IsoA1 TA system, triggers rapid**  
114 **transformation of *H. pylori* into coccoids**

115 Recently, the study of the AapA1/IsoA1 TA system of *H. pylori* (**Fig. 1A**) showed that  
116 expression of the AapA1 toxin (a 30 amino acids-long hydrophobic peptide) leads to bacterial  
117 growth arrest (20). Given the genetic organization of the type I AapA1/IsoA1 locus in B128  
118 strain, we decided to investigate the mechanism underlying the activity of AapA1 by using a  
119 strain in which AapA1 is under the control of an inducible promoter. We thus transformed *H.*  
120 *pylori* strain B128 deleted of the AapA1/IsoA1 locus with each of the three plasmids  
121 constructed by Arnion *et al.* (20) (**Fig. 1A**). The first, pA1-IsoA1, derived of the pILL2157  
122 vector (21) contains a functional TA locus in which the AapA1 gene is under the control of an  
123 IPTG inducible promoter (20). In plasmid pA1, derived from this first construct, the antitoxin  
124 IsoA1 promoter has been inactivated by point mutations that do not interfere with  
125 transcription or translation of the AapA1 ORF (20). Derived from this second construct,  
126 plasmid pA1\* contains an additional mutation that inactivates the start codon of the AapA1  
127 peptide (20). Under our experimental conditions, we observed, in agreement with data of (20),  
128 that addition of IPTG did not significantly influence the growth rate of strains harboring pA1-  
129 IsoA1 or pA1\*. In contrast, addition of the inducer causes a rapid and immediate growth  
130 arrest of *H. pylori* with pA1 indicating a toxic effect of AapA1 expression (**Fig. 1B**). The  
131 growth arrest was accompanied by loss of culturability of more than 10<sup>4</sup>-fold 8h after  
132 induction.

133 In parallel to growth, we investigated the consequences of AapA1 expression on *H. pylori*  
134 morphology. Samples from bacterial cultures with these plasmids were grown in the presence  
135 or absence of IPTG, stained with a membrane-specific dye (TMA-DPH) and analyzed by  
136 fluorescence microscopy at different time points (**Fig. 1C**). *H. pylori* cells expressing the  
137 wild-type AapA1/IsoA1 locus (pA1-IsoA1) or the pA1\* mutated locus present a classical  
138 helical rod shape phenotype upon IPTG exposure (**Fig. 1C**). Under the same conditions, cells

139 carrying the pA1 plasmid, and thus expressing the AapA1 toxin exhibit a rapid and dramatic  
140 morphological conversion to spherical cells also known as coccoid forms. Eight hours after  
141 IPTG-induction, some bacteria containing pA1-IsoA1 start to convert to coccoids, this is  
142 probably due to accumulation of the AapA1 toxin under these conditions. No bacterial lysis  
143 was detected even at 24h post-induction. With strains carrying the pA1\* plasmid, coccoids  
144 were only observed after 48h of culture, similarly to the control wild type strain containing an  
145 empty plasmid. These data show for the first time that the AapA1 toxin induces a fast  
146 conversion of *H. pylori* cells from spiral-shaped to coccoid forms.

147

#### 148 **Inner membrane targeting by the AapA1 toxin**

149 To investigate the mode of action of the AapA1 toxin, we first analyzed its subcellular  
150 localization in *H. pylori* using three reporter strains. Two constructs corresponded to C-  
151 terminal fusions of the toxin with a SPA-tag (pA1-SPA) (20) or with GFP (pA1-GFP)  
152 expressed from the IPTG-inducible promoter of vector pILL2157 (21) (**Fig. S1**). These  
153 plasmids were introduced into *H. pylori* strain B128 deleted of the chromosomal  
154 AapA1/IsoA1 module. After IPTG induction none of these fusions affected *H. pylori* growth  
155 indicating that a C-terminal fusion prevents the toxicity of the toxin. Attempts to construct N-  
156 terminal tagged-AapA1 were unsuccessful. In addition, a B128 derivative expressing a  
157 chromosomal AapA1-GFP fusion under control of its native promoter was constructed (**Fig.**  
158 **S1**).

159 Cellular fractionation was then performed on the three strains, and the subcellular  
160 localization of the fused toxins was analyzed by immunoblotting. **Figure 2A** shows that upon  
161 induction by IPTG, the large majority of the AapA1-SPA is present at the inner membrane of  
162 *H. pylori* with no peptide detected in the culture medium. Identical results were obtained with  
163 the A1-GFP fusion expressed either from the inducible plasmid or the chromosome (**Fig. S2**).  
164 Fluorescence microscopy of live bacteria after induction of the AapA1-GFP fusion revealed a

165 weak patchy pattern in the periphery of the cell (**Fig. 2B**), different from a GFP-alone control  
166 cell (**Fig. S2**), and compatible with membrane localization. This observation was confirmed  
167 by measuring the overlap of the fluorescence intensity profiles of the toxin and TMA-PH  
168 measured perpendicular to the length axis of *H. pylori* (**Fig. 2B**).

169 From these results, we conclude that the AapA1 toxin is specifically targeted to the inner  
170 membrane of *H. pylori*.

171

### 172 **AapA1 toxin has a minor impact on *H. pylori* membrane potential and intracellular ATP** 173 **content**

174 Considering the membrane localization of the toxin, we hypothesized that AapA1  
175 expression could affect the membrane potential and by consequence the ATP content of the  
176 cells. To explore this possibility, *H. pylori* cells harboring pA1-IsoA1, pA1\* or pA1 plasmids  
177 were taken at different culture time points, stained with a membrane potential sensitive dye  
178 (MitoRed CMXROS) and analyzed by microscopy (**Fig. 2C**). Bacteria harboring either an  
179 empty plasmid (B128), pA1-IsoA1 or pA1\* exhibit a uniform MitoRed CMXROS  
180 fluorescence pattern indicative of membrane integrity. For *H. pylori* cells overexpressing  
181 AapA1 and converting to coccoids, the fluorescence pattern progressively evolves from  
182 uniform to that of discrete foci, suggesting local changes in membrane permeability. No such  
183 foci were observed with coccoids from aging WT strain cultures (72h) or with cells treated  
184 with 3,5,3',4'-tetrachlorosalicylanilide (TCS), an effective *H. pylori* protonophore (22) that  
185 causes an overall MitoRed CMXROS fluorescence loss due to massive dissipation of  
186 membrane potential (**Fig. 2C**). Similar results were obtained with the membrane potential  
187 sensitive dye DIOC-5, confirming the local effect of AapA1 on *H. pylori* inner membrane  
188 (**Fig. S3**). These data indicate that when the AapA1 toxin is expressed in *H. pylori*, the  
189 membrane permeability is not globally compromised but probably locally perturbed.



190 Next, the ATP content of *H. pylori* strains carrying either pA1-IsoA1 or pA1 was  
191 measured from total metabolites extracted at different culture time points and quantification  
192 by a luciferase based-assay (**Fig. 2D**). After 6h of culture, IPTG induction had a minor effect  
193 on cellular ATP content of both strains as compared to the drastic consequences observed  
194 with the TCS control. Note that at 6h of culture with IPTG, most of the pA1-containing cells  
195 have already transformed into coccoids. After 16h, the overall ATP content strongly drops in  
196 both strains and IPTG induction causes an additional weak decrease that is poorly changed  
197 upon toxin expression by pA1 (**Fig. 2D**).

198 Taken together, these results show that the AapA1 toxin locally perturbs the *H. pylori*  
199 membrane potential with no major consequences on the cellular ATP content. We conclude  
200 that dissipation of membrane potential is not the major cause of toxin-induced bacterial  
201 growth arrest.

202

### 203 **Ultrastructural analysis of toxin-induced coccoids**

204 For the first time, cryo-electron microscopy (cryo-EM) was used to visualize *H. pylori*  
205 coccoids in near-native states. Using this method, we compared exponentially growing  
206 bacteria, toxin-induced coccoids and aging coccoids (70h growth) (**Fig. 3**). In exponential  
207 phase, the characteristic helicoidal shape of *H. pylori* (strains B128 WT, 4h and pA1-IsoA1,  
208 4-8h) was perfectly visible with a uniformly contrasted cytoplasm surrounded by two dense  
209 layers of membranes and multiple flagella. The periplasm of variable thickness surrounding  
210 the cell is distinguishable as the low-density space between the inner and outer membrane.  
211 Strains expressing the toxin (pA1 at 4-8h) have intact flagella and are visible in two major  
212 morphotypes. In the first “U” shaped morphology, a round intact outer membrane surrounds a  
213 bent intact inner membrane. The second morphotype corresponds to round coccoids of a  
214 diameter of approximately 1 $\mu$ m, with visible integrity of both membranes and a central

215 uniformly stained dense cytoplasm. This second morphotype is similar to that of aging  
216 coccoids from the WT strain (70h).

217 In conclusion, CryoEM images revealed that the toxin-induced *H. pylori* coccoids have no  
218 visible defect in membrane integrity and are ultrastructurally similar to aging coccoid forms.

219

## 220 **Modification of peptidoglycan composition upon transformation of *H. pylori* into** 221 **coccoids**

222 Our data showed that the AapA1 toxin targets *H. pylori* inner membrane without causing  
223 significant membrane potential collapse and without visible loss of integrity. Therefore, we  
224 tested whether the toxin-induced cell shape transformation could be associated with  
225 modifications in the cell wall and thus in peptidoglycan (PG) composition. PG extracted from  
226 B128 WT strain in exponential phase or after 72h growth (aging coccoids) was compared to  
227 PG from the pA1 strain induced during 6 and 16h (toxin-induced coccoids). Samples were  
228 digested with mutanolysin and subjected to HPLC/MS analyses. The relative abundance of  
229 muropeptides in each sample was calculated according to Glauner *et al.* (23) (**Table S1**).  
230 When compared to PG of helicoidal *H. pylori*, both “aging” and “toxin-induced” coccoids  
231 present similar changes in dipeptide and tripeptide monomers with a stronger effect of toxin-  
232 induction at 16h. Coccoids after 16h induction present a 3-fold increase in dipeptide  
233 monomers concomitant with tri- and pentapeptide monomers reduction. These data indicate  
234 that toxin-induced and aging coccoids undergo similar PG modifications, compatible with a  
235 looser PG macromolecule, and suggest that they might be generated by similar mechanisms.

236

## 237 **Kinetics of the toxin-induced *H. pylori* morphological transformation assessed by live** 238 **cell imaging**

239 To progress in our understanding of the morphological conversion of *H. pylori*, we  
240 monitored the entire process of *H. pylori* toxin-induced conversion by live cell time-lapse

241 microscopy under physiological microaerobic conditions in a temperature-controlled chamber.  
242 The *H. pylori* B128 strain tested constitutively expressed cytoplasmic GFP, was impaired in  
243 motility (by deletion of *flaA* encoding the major flagellar protein) and carried the inducible  
244 toxin-expressing plasmid pA1. Individual live *H. pylori* bacteria were monitored in agarose  
245 pad by both phase contrast and fluorescence microscopy.

246 First, the general growth features of the strain were established in the absence of the IPTG  
247 inducer. Under these conditions, statistics of the data collected showed that the strain has a  
248 mean doubling time of 165 min (indicative of optimal growth conditions) with an initial  
249 bacterial length of 2.1 $\mu$ m after division and a maximum length prior to division of 3.7 $\mu$ m (**Fig.**  
250 **S4**). In a second round of experiments, the inducer was added to the pad and snapshots of the  
251 cells were taken at intervals of 10 or 15min during 10h (**Fig. 4**). A total number of 63 cells  
252 were analyzed from 4 independent experiments, the data are statistically significant. Two  
253 representative movies can also be viewed in **Fig. S5**. Only 14 cells did not show visible cell  
254 shape modification while the majority (49 bacteria) went through sequential morphological  
255 transformations. We classified the transformation steps into 3 categories: “bending” (U-  
256 shaped), “pseudo-cocoid” (quasi-round bacteria) and “donut” (fully developed coccoids) and  
257 quantified them (**Fig. 4**). At 185 $\pm$ 8.0 min post-induction, 77% of the cells analyzed had  
258 undergone bending. One hundred minutes later, only 12 cells were still at this stage while the  
259 others had turned into pseudo-cocoids. Finally, one third of the analyzed cells (21 cells)  
260 ended up in the round “donut” shape at 420 $\pm$ 25.2 min after toxin-induction.

261 Most interestingly, the length of bacteria just before they entered the first morphological  
262 transformation (bending) was 3.48 $\pm$ 0.08 $\mu$ m, which precisely corresponds to the maximum  
263 length we measured before *H. pylori* division. In addition, we observed many examples of  
264 two bacteria that were dividing but not yet separated and from which one out of the two  
265 underwent morphological transformation (see movie in **Fig. S5**). This analysis gave us a  
266 dynamic picture of the morphological transformation of *H. pylori*. Importantly, this analysis

267 strongly suggests that the morphological transformation is consecutive to a toxin-induced  
268 perturbation of cell division, through a mechanism that is still to be defined.

269

## 270 **Toxin-antitoxin imbalanced expression upon oxidative stress**

271 We then searched what physiological signal could trigger the induction of the AapA1 toxin  
272 expression in *H. pylori*. First, the respective activities of individual *aapA1* and *IsoA1*  
273 promoters were measured with chromosomally expressed transcriptional *lacZ* fusions (**Fig.**  
274 **S1**). Under normal growth conditions,  $\beta$ -galactosidase activities indicated that the antitoxin  
275 promoter has a 10-fold stronger activity than the toxin promoter (**Fig. 5A**). This result is  
276 consistent with type I TA features where the antitoxin RNA is strongly expressed (but highly  
277 labile) compared to the more stable toxin transcript that is expressed at a lower level (7, 8, 18).  
278 The *lacZ* fusions were then used to follow the activity of the two promoters during *H. pylori*  
279 growth and to search for conditions relevant to *H. pylori* life-style that could lead to  
280 imbalanced expression of the two promoters. Only a slight increase in activity of both  
281 promoters was observed over time of growth (**Fig. 5A**). No significant differential expression  
282 of the promoters was observed upon acid, antibiotic stress or during exposure to high nickel  
283 concentrations (**Fig. S6**). In contrast, oxidative stress induced by hydrogen peroxide ( $H_2O_2$ )  
284 resulted in a strong specific decrease in the *IsoA1* promoter activity while, at the same  
285 concentration, the toxin promoter activity was marginally reduced (**Fig. 5B**). Exposure to  
286 paraquat, another oxidative stress agent, resulted in a comparable strong decrease of both  
287 promoters. The expression patterns and stability of the *aapA1* and *IsoA1* transcripts were then  
288 analyzed by Northern Blot with total RNA extracted at different time points after rifampicin  
289 addition. As shown in **Fig. 5C** and **Fig. S7**, the *aapA1* transcript was detected as a 175  
290 nucleotide-long band with an estimated half-life of approx. 120min. In contrast, the 75 nt  
291 *IsoA1* full length transcript declines much faster, with an estimated 25min half-life, and the  
292 production of an approx. 50 nt short processed form. Upon hydrogen peroxide exposure, the

293 half-life of the AapA1 transcript was not significantly modified while we observed a more  
294 rapid depletion of the full-length *IsoA1* transcript with an almost immediate accumulation of  
295 the processed form (**Fig. 5C**). From three independent experiments, we quantified the relative  
296 amounts of the transcripts under normal growth conditions versus H<sub>2</sub>O<sub>2</sub> exposure during 120  
297 min after rifampicin addition (**Fig. 5D**). No significant change was observed for the *aapA1*  
298 transcript while H<sub>2</sub>O<sub>2</sub> exposure resulted in a diminished half life of the *IsoA1* full length  
299 transcript and in an imbalanced ratio of *IsoA1* in favor of its processed form (**Fig. 5D**). Taken  
300 together, these results show that H<sub>2</sub>O<sub>2</sub> causes both diminished *IsoA1* transcription and  
301 increased degradation of *IsoA1* full-length transcript. These observations suggest that, by  
302 decreasing the amounts of antitoxin transcript, exposure to oxidative stress favors translation  
303 of the AapA1 mRNA and thus toxin production.

304

### 305 **Oxidative stress induction of coccoids: are class A Type I TA the only effectors ?**

306 Since we established that oxidative stress results in imbalanced expression in favor of the  
307 expression AapA1 toxin, we examined the consequences of exposure to this condition on *H.*  
308 *pylori* morphology and viability. Upon H<sub>2</sub>O<sub>2</sub> oxidative stress, we observed a rapid  
309 transformation into coccoids (approx. 6h) in strain B128. This strain contains six class A type  
310 I TA systems, the A2 locus being inactive (**Fig. S8**). To assess their role, we constructed  
311 mutants carrying deletions of each of its active AapA/IsoA TA loci,  $\Delta A1$ ,  $\Delta A3$ ,  $\Delta A4$   
312 (including deletion of both *A4-1* and *A4-2* tandem systems),  $\Delta A5$ ,  $\Delta A6$  or of the five loci  
313 collectively ( $\Delta 5$ ) using a non-marked deletion strategy (24). Under normal conditions, the  
314 growth rate, culturability and kinetics of occurrence of coccoids of the different mutants was  
315 similar to that of the parental strain (**Fig. S9**). Upon H<sub>2</sub>O<sub>2</sub> oxidative stress, the  $\Delta 5$  mutant  
316 strain displayed similar kinetics of conversion to coccoids when compared to the parental  
317 strain.

318 This shows that oxidative stress is triggering transformation into coccoid but that the type I  
319 toxins are not the only effectors. TA systems have been shown to play a role in persister cell  
320 formation under stress conditions (7, 8). Therefore, the number of persisters after exposure to  
321 hydrogen peroxide was measured for the  $\Delta A1$  and  $\Delta 5$  mutants and compared to the parental  
322 strain (**Fig. S9**). No significant difference was observed, suggesting that, upon hydrogen  
323 peroxide stress, the class A TA systems are not promoting viable persisters in *H. pylori*.  
324

## 325 **Discussion**

326 Here we established that the expression of a small toxin from a toxin-antitoxin system  
327 triggers a massive and rapid morphological transformation of the spiral-shaped *H. pylori*  
328 bacterium into round coccoid cells. Transformation of spirals into coccoids has been observed  
329 after extended *H. pylori* growth (>70h, aging coccoids) or upon stress conditions (14) but the  
330 process itself was poorly characterized. The toxin (AapA1) is a small hydrophobic peptide of  
331 a type I TA system that we showed here to target *H. pylori* inner membrane without being  
332 secreted. Toxins of type I TA system from other organisms such as *Escherichia coli*, *Bacillus*  
333 *subtilis* or *Staphylococcus aureus* have been shown to localize to the inner membrane but  
334 there are no reports on induction of major cell shape modifications (8, 25-27). The *E. coli*  
335 TisB (28) and the *S. aureus* PepA1 (29) toxins act by creating membrane pores (similar to  
336 phage holins) thereby disrupting the membrane potential, drastically impairing ATP synthesis  
337 and depending on the toxin concentration, either leading to the formation of persisters or to  
338 cell death (8, 27). One notable exception is the BsrG/SR4 Type I TA system of *B. subtilis*  
339 (26). The BsrG toxin was found to target the membrane without causing destruction or  
340 affecting the Proton Motive Force but it rather directly interferes with the cell envelope  
341 biosynthesis, indirectly delocalizes the cell-wall synthesis machinery and ultimately triggers  
342 bacterial autolysis (26). There are now two examples of type I TA hydrophobic toxins (BsrG  
343 and AapA1 reported here) that do not act by permeabilizing the membrane and probably  
344 reflect a novel mode of action for small peptidic toxins.

345 Using for the first time cryo-EM, we observed that toxin-induced *H. pylori* coccoids  
346 present neither visible membrane disruption nor pores even 8h post toxin induction and are  
347 ultrastructurally comparable to 70h-old aging coccoids. The membrane potential of coccoids  
348 was not dissipated despite the fact that the toxin induces local perturbation of the membrane.  
349 This is in contrast with a previous study that reported a total loss of membrane potential in *H.*  
350 *pylori* aging coccoids, associated with a complete loss of membrane integrity (30). Unlike the

351 effects of the TisB toxin in *E. coli* (28), we found that the ATP content in our *H. pylori* toxin-  
352 induced coccoids is marginally affected and drops only after prolonged culture, as it is the  
353 case for spiral-shaped cells (31).

354 Toxins expressed by TA systems cause growth arrest by interfering with conserved vital  
355 cellular processes such as translation, division or peptidoglycan (PG) synthesis (8, 27). In  
356 bacteria, PG cell-wall dictates cell shape. We found that coccoid transformation was  
357 accompanied by changes in PG composition. Indeed, when compared to spirals, coccoids  
358 have a three-fold increase in dipeptide monomers concomitant with a tri- and pentapeptide  
359 monomers reduction. These changes are comparable to those previously reported for “aging”  
360 *H. pylori* coccoids (32) and were confirmed here. Our results point to a reduction in the  
361 potential for generating new cross-bridges in the PG; this is compatible with a looser PG  
362 macromolecule and could explain the morphological transition to coccoids. The PG  
363 metabolism has been extensively studied in *H. pylori* (33). The modifications we observed in  
364 coccoids suggest activation of at least three sequential *H. pylori* PG hydrolase activities. A  
365 D,D-carboxypeptidase that transforms pentapeptides into tetrapeptides; HdpA/Csd3 is the  
366 only reported such enzyme (34). A L,D-carboxypeptidase that transforms tetrapeptides into  
367 tripeptides carried out by Csd6, a member of the L,D-transpeptidases (33). Finally, a (g)-  
368 glutamyl-diaminopimelate carboxypeptidase generating dipeptides from tripeptides carried  
369 out by Cds4, a member of the M14-zinc metallopeptidases (33). We previously showed that  
370 these three PG modifications are blocked in a mutant deficient in AmiA, a putative *H. pylori*  
371 amidase and that an *amiA* mutant fails to transform into coccoids (35). Therefore, we propose  
372 that AmiA could be a central hub for the functionality of a PG hydrolase complex including  
373 AmiA, HdpA, Csd4 and Csd6. In this case, the AapA1 toxin would interfere with the function  
374 of this complex by causing abnormal activation of their enzymatic activities.

375 Life imaging analysis of the toxin-induced conversion of *H. pylori* spirals into coccoids  
376 suggested that the AapA1 toxin interferes with cell division. This is also consistent with a



377 central role of AmiA in the conversion, indeed this enzyme was shown to be essential for the  
378 separation of daughter cells (35). In *E. coli*, the CbtA toxin of a type IV TA system was found  
379 to inhibit cell division and cell elongation via direct and independent interactions with FtsZ  
380 and MreB (36). More work is needed to identify the molecular target(s) of the AapA1 toxin.

381 Under normal conditions, as for all TA systems, the *IsoA1* antitoxin potently inhibits the  
382 AapA1 toxin, by preventing its expression through a multilayered mechanism (20). We  
383 searched for physiological conditions that could result in toxin expression. We found that  
384 oxidative stress, generated by H<sub>2</sub>O<sub>2</sub>, causes a rapid and specific decline in the levels of IsoA1  
385 antitoxin full-length transcript by reducing both its promoter activity and enhancing its  
386 degradation through a mechanism that remains to be precisely defined. Imbalanced expression  
387 of the AapA1/IsoA1 system in favor of the toxin mRNA should lead to toxin expression.  
388 Accordingly, we observed that H<sub>2</sub>O<sub>2</sub> causes a rapid conversion of *H. pylori* into coccoids  
389 resembling those induced by the AapA1 toxin. Prolonged exposure to aerobic conditions was  
390 previously reported to lead to the coccoid formation, however, in that case these cells lost  
391 their membrane integrity (37). Regulation of type I TA systems in response to stress had been  
392 observed in other species. For the *bsrE*/SR5 type I system of *B. subtilis*, the SR5 antitoxin is  
393 affected by pH, anoxia and iron limitation while the BsrE toxin is sensitive to temperature  
394 shock and alkaline stress (38). In *S. aureus*, the SprA1/SprA1<sub>AS</sub> system is induced in response  
395 to acidic or oxidative stresses (29). In *E. coli*, several type I toxins are induced by the SOS  
396 response (7), a system that does not exist in *H. pylori*.

397 The biological function of *H. pylori* coccoids is still a matter of debate. Coccoids are  
398 observed in prolonged *in vitro* cultures and induced by stress conditions, mostly aerobic,  
399 anaerobic culture or exposure to antibiotic or oxidative stress. However, these reports are  
400 difficult to compare since no standard procedure was used and analysis was most of the time  
401 performed after more than a week stress exposure (14, 30, 39). *H. pylori* coccoids are non-  
402 culturable cells under standard laboratory growth conditions. Our analysis of both toxin-

403 induced and 70h aging coccoids are in favor of their viability despite their “unculturability”.

404 We argue that contradictory conclusions on viability refer to “damaged” or so-called

405 “fragmented” coccoid forms corresponding to membrane-less bacteria in prolonged *H. pylori*

406 cultures (30). In favor of coccoid viability are previous reports showing that coccoids express

407 virulence factors (14) and are capable, like spirals, of binding to host cells and inducing

408 cellular changes (40). *H. pylori* coccoids were also visualized in human gastric biopsies (41),

409 probably as part of biofilms (39). In mice, coccoids induce gastritis (42) and can revert to

410 colonizing spiral bacteria (43). Taken together, these observations suggest that coccoids are

411 “dormant” viable forms of *H. pylori* that recover during host infection and might play a role

412 in transmission or in treatment failure. In agreement with this view, Chaput *et al.* (35) showed

413 that coccoids present decreased activation of NF- $\kappa$ B and might allow the bacterium to escape

414 the host immune response.

415 We showed that *H. pylori* coccoids are induced by a class A type I TA toxin and by

416 oxidative stress probably through the imbalanced expression of TA systems. During infection,

417 *H. pylori* is indeed exposed to harsh oxidative stress as a consequence of the chronic

418 inflammation it generates (44). Deletion of the five “class A” Type I TA clusters of *H. pylori*

419 did not preclude the oxidative stress induction of coccoids nor did it change the number of

420 persister cells. We concluded that these toxins are probably not the only triggers of coccoid

421 transformation and suggest that the two other classes of chromosomally-encoded type I TA

422 systems (B and C representing 9 systems) might also be important.

423 Dormant/persister bacteria present enhanced tolerance to antibiotics and it has been shown

424 that they can be induced by TA systems (7, 8), although other mechanisms resulting in

425 lowered ATP content are also associated with their occurrence (11). We hypothesize that TA-

426 induced *H. pylori* coccoids are dormant bacteria and, as previously proposed, that non-

427 culturable cells and “classical” dormant bacteria/persisters are part of a shared “dormancy

428 continuum” (45). In our model, this continuum would depend on the intracellular toxin  
429 concentration as already suggested (46).

430 Stress-induced morphological transformation of bacteria into non-culturable coccoid-like  
431 cells has been reported in at least 85 bacterial species among which important bacterial  
432 pathogens such as *Campylobacter jejuni*, *Vibrio cholerae* or *Salmonella typhimurium* (16).  
433 For these organisms, the inducing trigger and function remains to be characterized. We  
434 postulate that these forms are dormant bacteria and that our findings on *H. pylori* might be  
435 more generally relevant and play important roles in recurrent and persistent bacterial  
436 infections.

437

438

439 **Figure legends**

440 **Figure 1: Expression of the AapA1 toxin from the AapA1/IsoA1 TA system induces**

441 **growth arrest and transformation of *H. pylori* strain B128 into coccoids.**

442 **A) Genetic organization of AapA1/IsoA1 locus in *H. pylori* B128 strain with the AapA1**  
443 **transcript encoding the toxin and the *IsoA1* antitoxin RNA. Below is the representation of the**  
444 **inserts of the three plasmids constructed by Arnion *et al* (20) and used in this study, each**  
445 **derived from the pILL2157 *E. coli*/*H. pylori* vector (21). These inserts are expressed under**  
446 **the control of an IPTG inducible promoter. Plasmid pA1-IsoA1 expresses both the toxin and**  
447 **the first 30 nucleotides of the *IsoA1* RNA antitoxin. In pA1, the promoter region of IsoA1**  
448 **was mutated without affecting the amino acid sequence of AapA1. Plasmid pA1\* was derived**  
449 **from pA1 and contained an additional mutation inactivating the start codon of AapA1.**

450 **B) Expression of the AapA1 toxin causes rapid growth arrest of *H. pylori* strain B128.**

451 **Growth kinetics of *H. pylori* B128 strains carrying each of the three plasmids illustrated in**  
452 **panel A, grown in the absence (black symbols) or in the presence of 1mM IPTG (empty**  
453 **symbols) that was added at the time indicated by an arrow (16h).**

454 **C) Expression of the AapA1 toxin induces transformation of *H. pylori* into coccoids.**

455 **Microscopy analysis of the *H. pylori* B128 strains carrying each of the three plasmids after**  
456 **growth in the absence of IPTG or at 4 and 8h following IPTG addition. *H. pylori* membranes**  
457 **were stained with the lipophilic dye TMA-DPH. Phase-contrast and fluorescence images are**  
458 **respectively represented on the upper and bottom panel. The scale bar corresponds to 1µm.**

459

460 **Figure 2: AapA1 toxin targets *H. pylori* inner membrane, weakly disturbs the bacterial**  
461 **membrane potential and poorly affects intracellular ATP content.**

462 **A) AapA1 toxin localizes to the *H. pylori* inner membrane. Western blot analysis of total**  
463 **extracts (T), soluble extracts (SE), inner membrane (IM) and outer membrane (OM) fractions**

464 prepared from *H. pylori* B128 strain expressing either a SPA tagged-AapA1 toxin (pA1-SPA)  
465 under control of an IPTG-inducible promoter or carrying plasmid pA1\* as a negative control.  
466 The fractionation procedure was validated with antibodies against the following control  
467 proteins, PBP2 for the inner membrane, AlpA for the outer membrane and NikR for the  
468 cytoplasm. In **Fig. S2**, we show that a A1-GFP fusion expressed either from the chromosome  
469 of B128 or from a plasmid also localizes at the inner membrane.

470 **B) In live cells, AapA1-GFP localizes as discrete foci around the *H. pylori* membrane.**

471 Strain B128 expressing the AapA1-GFP fusion protein was analyzed on agarose pads by  
472 fluorescence microscopy 6h after IPTG-induction. Membranes were stained with TMA-DPH  
473 lipophilic dye. The membrane association of AapA1-GFP was quantified by measuring the  
474 fluorescence intensity profile perpendicular to the length axis of *H. pylori*. The graph shows  
475 the average fluorescence intensity profiles with standard deviation (n=25). The fluorescence  
476 maxima separated by 0.5  $\mu\text{m}$ , correlate with the *H. pylori* cell width.

477 **C) Analysis of the effect of the AapA1 toxin on *H. pylori* membrane potential.**

478 MitoRed CMXRos, a membrane potential reactive dye was used to analyze live *H. pylori*  
479 B128 strains expressing each of the three plasmids illustrated in **Fig. 1**. Cells were grown in  
480 presence or absence of 1mM IPTG and analyzed on agarose pads at 0, 4, 8 and 24 h after  
481 IPTG addition. While uniformly stained by the MitoRed CMXRos in the absence of IPTG,  
482 cells expressing the toxin (pA1) present discrete foci of stronger fluorescence suggesting a  
483 local disturbance of the membrane potential. For comparison, a 72h-old culture of B128 WT  
484 strain forming “aging” coccoids was also analyzed. As a positive control of membrane  
485 potential loss, 4h-old B128 WT cells were analyzed after treatment or not with TCS (3,3',4',5'-  
486 Tetrachlorosalicylanilide) an *H. pylori* active protonophore. Bar scale represents 1  $\mu\text{m}$ .

487 **D) Measurement of intracellular ATP content.**

488 Intracellular ATP was extracted from B128 strains harboring pA1-IsoA1 or pA1 after 6 or  
489 16h growth in the presence or absence of IPTG. B128 WT strain treated with 500  $\mu\text{M}$  of TCS

490 protonophore was used as a positive control. ATP concentrations were determined using a  
491 luciferase-based assay (BacTiter-Glo™, Promega). Results from 3 independent experiments  
492 performed in triplicates are shown. Error bars represent the standard deviation, with \* and \*\*  
493 indicating that the mean value is significantly different, \* corresponds to  $P < 0.05$ , \*\* to  $P <$   
494  $0.01$ , \*\*\* to  $P < 0.001$  and NS corresponds to non-significant, ( $P > 0.05$ ).

495

496 **Figure 3: Ultrastructural analysis of toxin-induced coccoids and “aging” coccoids by**  
497 **cryo-electron microscopy.**

498 Cryo-electron microscopy was used to compare “aging” coccoids (70 h-old cultures) and  
499 exponentially growing B128 strains carrying plasmid pA1-IsoA1 or pA1 grown for 4 or 8h in  
500 the presence of IPTG. Expression of the toxin results in the formation of U-shaped bacteria at  
501 4h and round coccoids cells at 8h with visible intact bacterial cell envelop similar to the aging  
502 coccoids. Scale bar represents 1 $\mu$ m.

503

504 **Figure 4: Time-lapse microscopy of *H. pylori* conversion to coccoid upon toxin**  
505 **expression.**

506 Live cell time lapse microscopy was used to record, during 10 hours, the morphological  
507 modifications of individual *H. pylori* B128 strain cells after IPTG-induction of the AapA1  
508 toxin. Phase-contrast and fluorescence images of one example of these kinetics are presented.  
509 Scale bar represents 2 $\mu$ m. Three major phenotypes were observed; “bending”, “pseudo-  
510 coccoids” and “donut”. Statistics (median and mean  $\pm$  SEM) on the total number of analyzed  
511 cells and the precise timing to reach the phenotypes are presented. SEM corresponds to  
512 standard error of the mean. Representative movies of the transformation can be seen in **Fig.**  
513 **S5.**

514

515 **Figure 5: Oxidative stress generated by hydrogen peroxide results in decreased antitoxin**  
516 **promoter activity and promotes *IsoA1* transcript processing.**

517 **A) Activity of the *AapA1* and *IsoA1* promoters as a function of growth.**

518  $\beta$ -galactosidase activities (expressed in Miller units) measured with *H. pylori* B128 strain  
519 carrying chromosomal *PaapA1-lacZ* and *PIsoA1-lacZ* fusions after 6, 24 and 48h growth.  
520 Results from 3 independent experiments performed in duplicates are shown. Error bars  
521 represent the standard deviation, with \* ( $P < 0.05$ ) and \*\* ( $P < 0.01$ ) indicating that the mean  
522 values are significantly different and NS indicating that they are not significantly different ( $P$   
523  $> 0.05$ ). The activity of the toxin fusion (*aapA1-lacZ*) is about ten times that of the antitoxin  
524 fusion (*IsoA1-lacZ*) and the activity of both promoters slightly increases as a function of  
525 growth.

526 **B) Oxidative stress generated by  $H_2O_2$  decreases antitoxin promoter activity.**

527  $\beta$ -galactosidase activities expressed by *PaapA1-lacZ* and *PIsoA1-lacZ* fusions were measured  
528 after 6h treatment with oxidative stress generators, paraquat (5, 50 and 500  $\mu$ M) and  $H_2O_2$   
529 (0.03 and 0.3%).  $\beta$ -galactosidase activities are presented as ratio (expressed in %) of activities  
530 measured with stress versus activities of untreated samples. Hydrogen peroxide strongly  
531 decreases the expression of the *PIsoA1-lacZ* fusion. Results from 3 independent experiments  
532 performed in duplicates are shown. Error bars represent the standard deviation, with \* ( $P <$   
533  $0.05$ ), \*\* ( $P < 0.01$ ), \*\*\* ( $P < 0.001$ ) indicating that the mean values are significantly different  
534 and NS that they are not significantly different ( $P > 0.05$ ).

535 **C) Determination of *AapA1* mRNA and *IsoA1* RNA half-lives in *H. pylori* strain B128**  
536 **under normal conditions and upon hydrogen peroxide exposure.**

537 Northern blots of total RNA from B128 WT strain grown under normal conditions or exposed  
538 to 1% hydrogen peroxide, extracted at the indicated times after addition of 80  $\mu$ g/ml  
539 rifampicin. Five  $\mu$ g of RNA were loaded in each lane and the membranes were probed with

540 [ $\gamma$ -<sup>32</sup>P] ATP-labeled oligonucleotides specific to the following RNAs, *aapA1*, *IsoA1* and 5S  
541 rRNA as a loading control. In the presence of H<sub>2</sub>O<sub>2</sub>, the half-life of *IsoA1* transcript is  
542 diminished in favor of the processed *IsoA1* form.

543 **D) Hydrogen peroxide promotes *IsoA1* transcript processing.**

544 Graphic representation of the effects of hydrogen peroxide exposure on the amounts of *aapA*  
545 and *IsoA1* transcripts as well as on *IsoA1* processing during 120 min after rifampicin addition.  
546 The relative amounts of *aapA1* (upper graph) and full length (FL) *IsoA1* (middle graph)  
547 RNAs versus 5S rRNA are shown. The lower graph presents the relative amounts of the two  
548 forms of *IsoA1*, full length (FL) versus the processed form. The results of 3 independent  
549 experiments are shown, error bars represent the standard deviation analyzed by two-way  
550 ANOVA multiple comparisons.

551



552

553 **Acknowledgments**

554 This work was funded by the Agence National de la Recherche (ANR 09 BLAN 0287 01 and  
555 ANR 12 BSV5-0025-02), the Laboratoire d'Excellence IBEID (Integrative Biology of  
556 Emerging Infectious Diseases) Grant ANR-10-LABX-62-IBEID from the French  
557 government's Investissement d'Avenir program and the Pasteur-Weizmann Consortium of  
558 "The Roles of Noncoding RNAs in Regulation of Microbial Life Styles and Virulence". LEM  
559 was funded by a Roux fellowship of the Institut Pasteur and by a Carnot MI fellowship. AR  
560 was supported by post-doctoral fellowship from the Labex IBEID (10-LABX-62-IBEID). We  
561 also thank Janssen for financial support. We are grateful to F. Darfeuille and H. Arnion for  
562 the gift of plasmids and to W. Fischer for the gift of anti-AlpA antibodies. We also appreciate  
563 the expertise and help of A. Chery-Faleme, M. Fromont-Racine and A. Jacquier with  
564 Northern blotting and of R. Wheeler for peptidoglycan extraction. We thank M. Denic, S.  
565 Kumar and A. Tejada-Arranz for comments on the manuscript and J. Berry for discussions.  
566 Finally, we thank M. Nilges and the Equipex CACSICE for providing the Falcon II direct  
567 detector.

568

## 569 **Material and Methods**

570

### 571 ***Bacterial strains and growth conditions***

572 The *H. pylori* strains used in this study (Suppl **Table S2**) were all derived of strain B128  
573 (47) (48). Plasmids (suppl **Table S3**) used to create or complement *H. pylori* mutants were  
574 constructed and amplified using *E. coli* One-Shot TOP10 or DH5 $\alpha$  strains (Thermofisher). *H.*  
575 *pylori* strains were grown on Blood Agar Base 2 (Oxoid) plates supplemented with 10%  
576 defibrinated horse blood and with the following antibiotics-antifungal cocktail: amphotericin  
577 B 2.5  $\mu\text{g.ml}^{-1}$ , polymyxin B 0.31  $\mu\text{g.ml}^{-1}$ , trimethoprim 6.25  $\mu\text{g.ml}^{-1}$  and vancomycin 12.5  
578  $\mu\text{g.ml}^{-1}$ . Selection of *H. pylori* mutants was performed using kanamycin 20  $\mu\text{g.ml}^{-1}$ ,  
579 Streptomycin 10 $\mu\text{g.ml}^{-1}$ , Apramycin 10 $\mu\text{g.ml}^{-1}$  or chloramphenicol 8  $\mu\text{g.ml}^{-1}$ . For liquid  
580 cultures, we used Brain Heart Infusion (BHI) broth (Oxoid) supplemented with 10% Fetal  
581 Calf Serum (FCS) (Eurobio), the antibiotics-antifungal cocktail and the selective antibiotic  
582 when necessary. *H. pylori* cells were grown at 37°C under microaerophilic atmosphere  
583 conditions (6% O<sub>2</sub>, 10% CO<sub>2</sub>, 84% N<sub>2</sub>) using an Anoxomat (MART Microbiology)  
584 atmosphere generator. When indicated, 1mM of isopropyl  $\beta$ -D-1-thiogalactopyranoside  
585 (IPTG, EuroMedex) was added to agarose pads or culture media.

586

### 587 ***Molecular techniques***

588 Molecular biology experiments were performed according to standard procedures and the  
589 supplier (Fermentas) recommendations. NucleoBond Xtra Midi Kit (Macherey-Nagel) and  
590 QIAamp DNA Mini Kit (Qiagen) were used for plasmid preparations and *H. pylori* genomic  
591 DNA extractions, respectively. PCR were performed either with Taq Core DNA polymerase  
592 (MP Biomedicals), or with Phusion Hot Start DNA polymerase (Finnzymes) when the  
593 product required high fidelity polymerase. The pGEM-T easy vector systems (Promega) was

594 used to construct in *E. coli*, the suicide plasmids that served for markerless deletions of TA  
595 systems in *H. pylori*.

596

### 597 ***Construction of H. pylori strains carrying mutation or plasmids***

598 Mutations of *H. pylori* were introduced into strain B128 either WT or a streptomycin  
599 resistant variant B128 *rpsL1* for markerless mutagenesis (24, 49). Chromosomal deletions of  
600 the *AapA1/IsoA1* locus, of the *flaA* gene, or of the different class A TA loci were performed  
601 either by insertion of a selectable antibiotic resistance marker to disrupt or replace the gene of  
602 interest or when necessary, by the markerless counter-selected mutagenesis strategy (24, 49).  
603 Plasmids were derived from the pILL2157 *E. coli/H. pylori* shuttle vector that contains an  
604 IPTG-inducible promoter (21). Deletions were introduced by allelic exchange using suicide  
605 plasmids (see suppl **Table S3**) or PCR fragments. Introduction of plasmids and construction  
606 of *H. pylori* mutants were obtained by natural transformation and selection with the  
607 corresponding antibiotic as described previously (24). PCR and sequencing of the regions of  
608 interest were used to validate the introduction of plasmids, deletion of genes of interest and  
609 correct insertion of fusions. Primers used for these constructs or their validation are listed in  
610 Suppl **Table S4**.

611

### 612 **Confocal Fluorescence Microscopy**

613 Fluorescence microscopy was performed with an Axio Observer microscope (Zeiss)  
614 equipped with an AxioCam camera under an X100 magnification. Acquisition images was  
615 performed using the axiovision software. Images were cropped and adjusted using ImageJ  
616 1.47v software. *H. pylori* B128 strains were grown in BHI medium with chloramphenicol (8  
617 µg/ml) to maintain the plasmids. IPTG was added to the culture and samples were taken at  
618 different time-points, concentrated by 2 min centrifugation at 3000 x g and washed twice with  
619 PBS buffer. Cells were immobilized using 2% (wt/vol) agarose pads containing PBS before

620 being imaged. In **Fig. 1C**, cell membranes were stained with 0.01 mM TMA-DPH (1-(4-  
621 trimethylammoniumphenyl)-6-phenyl-1,3,5-hexatriene p-toluenesulfonate, Euromedex).  
622 Membrane potential was revealed with 25nM MitoTracker®Red CMXRos (Invitrogen) in  
623 **Fig. 2C** and with 1µM DiOC-5 (3) (3,3-Dipentylloxacarbocyanine iodide, Interchim) in **Fig.**  
624 **S3**. For the membrane potential analysis, the negative control was obtained by treatment with  
625 the protonophore 500µM TCS (3,3',4',5-Tetrachlorosalicylanilide; Fisher scientific).

626

### 627 **Fractionation and Immunoblotting**

628 The protocol of *H. pylori* fractionation was adapted from (50). *H. pylori* strains were  
629 grown in the absence or presence of 1mM IPTG. When cultures reached OD<sub>600</sub> 0.8, cells were  
630 harvested by centrifugation, washed twice in phosphate-buffered saline medium (PBS) prior  
631 to their disruption by sonication in Buffer 1, 10mM Tris-HCl, pH7.5 containing 5mM β-  
632 mercaptoethanol and proteases inhibitors (cOmplete™, EDTA-free Protease Inhibitor Cocktail,  
633 Roche). Cell debris were removed by centrifugation (10 min, 16,000 x g, 4°C) and  
634 supernatants containing the soluble extract and membrane fractions were collected as total  
635 extracts. Samples of total extracts were frozen and the remaining supernatants were subjected  
636 to ultracentrifugation (125,000 x g, 45 min, 4°C). Samples from the supernatant containing  
637 the cytoplasm and periplasm were collected and frozen while pellets containing total  
638 membranes were resuspended in buffer 1 supplemented with 1% N-lauroylsarcosine (Buffer  
639 2) prior to be ultracentrifuged (125,000 x g, 45 min, 4°C). Samples of inner membrane  
640 fractions from supernatants were frozen. Outer membrane pellets were washed twice in buffer  
641 2 to avoid inner membrane fractions contamination prior to freezing. In each fraction, protein  
642 amounts were calibrated using the Bradford DC Protein Assay (Biorad) with bovine serum  
643 albumin (BSA) as a standard. For each cellular compartment, equal protein amounts were  
644 loaded and separated on a 4-20% Mini-Protean TGX precast protein gel (BioRad) and  
645 subsequently electrotransferred on a polyvinylidene difluoride (PVDF) membrane (Biorad).

646 The *H. pylori* proteins PPB2, AlpA and NikR as well as the fusion protein A1-SPA or A1-  
647 GFP were detected with rabbit polyclonal antibodies  $\alpha$ -PBP2 (51),  $\alpha$ -AlpA (50),  $\alpha$ -NikR  
648 (52); with mouse monoclonal anti-FLAG M2 antibody (Sigma-Aldrich) or with goat anti-  
649 GFP-HRP antibody (Abcam) at the respective dilutions of 1:2,000, 1:1,000, 1:100 and  
650 1:1,000 or 1:5,000. Goat anti-rabbit IgG-HRP (Santa Cruz) and ECL anti-mouse IgG  
651 Horseradish Peroxydase (Amersham) were used as secondary antibodies and the detection  
652 was achieved with the ECL reagent (Pierce).

653

#### 654 **ATP extraction and assay**

655 Exponentially growing *H. pylori* cells (6h of culture OD<sub>600nm</sub> 0.35) and stationary growing  
656 cells (16h, OD<sub>600nm</sub> 3) were harvested by centrifugation at room temperature for 4 min at  
657 5000g. Metabolites from the resulting cell pellets were extracted immediately using 300 $\mu$ L of  
658 a solvent mixture of Acetonitrile/Methanol/H<sub>2</sub>O (40/40/20) for 15min at 4°C and 10min at  
659 95°C. Mixtures were subsequently spun in a microfuge for 5 min at maximum speed and 4°C  
660 to separate insoluble materials from the extracted metabolites. The resulting pellets were then  
661 re-extracted twice with 200  $\mu$ L of solvent at 4°C. The supernatants were pooled to yield 700  
662  $\mu$ L of final extract. Metabolites were lyophilized and subsequently diluted in water for ATP  
663 assays. ATP content was determined by a luciferase based ATP bioluminescence assay kit  
664 (BacTiter-Glo™ Microbial cell viability assay, Promega). Luminescence values were  
665 determined using a 10 sec RLU signal integration time and measured using a Centro XS<sup>3</sup>  
666 LB960 Luminometer (Berthold Technologies). ATP concentrations were calculated based on  
667 values determined using serial dilutions of known amounts of ATP and expressed as a  
668 function of the OD<sub>600nm</sub> of the corresponding culture.

669

#### 670 **Cryo-electron microscopy**

671 Four  $\mu\text{L}$  of *H. pylori* bacteria were spotted on glow-discharged lacey grids (S166-3, EMS) or  
672 Quantifoil R2/2 (Quantifoil, Germany). The samples were cryo-fixed by plunge freezing at -  
673  $180^{\circ}\text{C}$  in liquid ethane using a Leica EMGP (Leica, Austria). Grids were observed at 200kV  
674 with a Tecnai F20 (Thermo Fisher Scientific). Images were acquired under low-dose  
675 conditions using the software EPU (Thermo Fisher Scientific) and a direct detector Falcon II  
676 (Thermo Fisher Scientific).

677

### 678 **Time-lapse microscopy**

679 Confocal analysis of live cells was performed as previously described (53). Twenty  $\mu\text{L}$  of  
680 exponentially grown bacteria ( $10^5$  cells) suspended in BHI with or without 1mM IPTG were  
681 deposited on 35mm glass bottom Petri dishes. The suspension was covered with BHI medium  
682 in 1.5% low melting agarose supplemented with Chloramphenicol ( $8\mu\text{g}/\mu\text{l}$ ) with or without  
683 IPTG (1mM). Live-cell imaging was performed with a Nikon A1R confocal laser scanning  
684 microscope system attached to an inverted ECLIPSE Ti (Nikon Corp., Tokyo, Japan) and  
685 equipped with an environmental chamber allowing the control of temperature ( $37^{\circ}\text{C}$ ),  
686 humidity (90%) and gas mixture (10%  $\text{CO}_2$ , 3%  $\text{O}_2$ ). GFP fluorescence images were captured  
687 through a Plan APO 60X objective (NA: 1.40) by using optimal spatial resolution settings.  
688 The cytoplasm compartment volume was defined by using GFP staining (excitation with 488  
689 nm laser, emission collected with an 500/50 nm filter set). Image captions were performed  
690 every 10min during 10h. Statistics were performed on a total of 63 cells from 4 independent  
691 experiments. Image treatment and analysis were performed using NIS elements (Nikon Corp.,  
692 Tokyo, Japan) and ImageJ software.

693

### 694 **$\beta$ -galactosidase activity assays**

695 *B128 $\Delta$ AapA1-IsoA1::PaapA1-lacZ-Kan* and *B128 $\Delta$ AapA1-IsoA1::PIsoA1-lacZ-Kan*  
696 strains were grown to  $\text{OD}_{600\text{nm}}$  0.3 in BHI liquid medium, then divided into two samples, one

697 of them being submitted to stress conditions during 6h with 5, 50 and 500  $\mu$ M paraquat  
698 (Sigma), 0.03 and 0.3% hydrogen peroxide (Sigma), 20 and 200 mM NiCl<sub>2</sub> (Sigma), 0.1 and  
699 1 mg/mL tetracycline, or 0.05 and 0.5 mg/ml rifampicin. Then 0.5ml samples were taken,  
700 washed twice with 1X PBS (Phosphate Buffered Saline) and further permeabilized with  
701 100 $\mu$ L Chloroform and 50 $\mu$ l SDS 0.1% in Z buffer containing 70mM Na<sub>2</sub>HPO<sub>4</sub>.12H<sub>2</sub>O,  
702 30mM NaH<sub>2</sub>PO<sub>4</sub>. H<sub>2</sub>O, 1mM MgSO<sub>4</sub> and 0.2mM MnSO<sub>4</sub> (54). Samples were briefly vortexed  
703 and incubated at 28°C for 2 min. The  $\beta$ -galactosidase assay was started by adding 0.5mL  
704 ONPG (ThermoFischer) at 4mg/ml and stopped by the addition of 0.5mL 1M Na<sub>2</sub>CO<sub>3</sub> when  
705 sufficient yellow color was reached. The  $\beta$ -galactosidase activity is expressed in Miller units  
706 (54) and represented in **Fig. 5** and **S6** as percentage of activities relative to the control activity  
707 with the corresponding strains not exposed to stress and was calculated from 3 independent  
708 experiments performed in duplicates.

709

#### 710 **Total RNA extraction and Northern blotting**

711 Total RNAs were extracted from 10 mL *H. pylori* cultures (OD<sub>600</sub> 0.5 -0.9) exposed or not to  
712 1% H<sub>2</sub>O<sub>2</sub> using the NucleoSpin miRNA kit (Macherey Nagel) at different time points after  
713 80  $\mu$ g/mL rifampicin addition (to stop transcription). For Northern blotting, 5  $\mu$ g of total RNA  
714 were separated on 10% Mini protean TBE Urea gel (Biorad) and transferred to Hybond N+  
715 (Amersham Biosciences) membrane using a Trans-Blot Turbo system (Biorad). A DNA  
716 marker was used for size estimation.

717 Transferred RNA was fixed to the membrane by UV irradiation for 2 min. The membrane  
718 was blocked for 45 min at 42°C with ULTRAhyb Hybridization Buffer (Ambion), then 20  $\mu$ l  
719 of 5'-labeled ( $\gamma^{32}$ P) oligodeoxynucleotides (**Table S4**) were added and the membrane was  
720 further incubated overnight at the same temperature. After three washes for 10 min at 65°C  
721 with 2x SSC 0.2 % SDS, the membrane was exposed to a phosphorimager screen (KODAK)

722 and scanned with FLA-9000 Phospho Imager (Fujifilm).

723

#### 724 **Peptidoglycan extraction and Muropeptides analysis by HPLC/HRMS**

725 Samples (1L) of *H. pylori* B128 WT strain (16h, exponential phase and 72h, “aging”  
726 coccoids) and of B128  $\Delta$ *aapA1-IsoA1* pA1 strain, induced by IPTG during 6h and 16h, were  
727 taken and chilled in an ice-ethanol bath. Crude murein sacculi were immediately extracted in  
728 boiling sodium dodecyl sulfate (SDS 4% final). The resulting purified peptidoglycan was  
729 digested overnight at 37°C in 12.5 mM sodium phosphate buffer (pH 5.6) supplemented with  
730 100 UI of mutanolysin from *Streptomyces globisporus* ATCC 21553 (Sigma). The reaction  
731 was stopped by heat inactivation of the enzyme and insoluble material was removed by  
732 centrifugation. Soluble muropeptides were then reduced with sodium borohydride in borate  
733 buffer (pH 9). After centrifugation, reduced muropeptides were diluted 20-fold in water-  
734 formic acid 0.1% (v/v; solvent A). HPLC/HRMS (High Performance Liquid Chromatography  
735 / High Resolution Mass Spectrometry) was performed on an Ultimate 3000 UHPLC (Ultra  
736 High Performance Liquid Chromatography) system coupled to a quadrupole-Orbitrap mass  
737 spectrometer (Q-Exactive Focus, Thermo Fisher Scientific). Muropeptides were separated on  
738 an Hypersil Gold aQ analytical column (1.9  $\mu$ m, 2.1x150 mm) at 200  $\mu$ L/min, column  
739 temperature at 50°C. Applied linear gradient from 0 to 12.5% acetonitrile + 0,1% (v/v) formic  
740 acid (solvent B), followed by increasing to 20% B at 25 min for 5 min, hold 20% B for min  
741 and additional 10 min with 100% A for column re-equilibration. Eluted muropeptides were  
742 introduced into Q-Exactive instrument, operating in positive ion mode, and then were  
743 analyzed in the data-dependent acquisition mode (FullMSddMS2). Data were then processed  
744 with the software TraceFinder 3.3 (Thermo Fisher Scientific) for peak areas determination,  
745 the relative abundance of muropeptides in each sample was calculated according to Glauner *et*  
746 *al.* (23).

747



748 **Statistical analysis**

749 The Student's t test was used to determine significance of the means of the data. Error bars  
750 represent the standard deviation, with \* ( $P < 0.05$ ), \*\* ( $P < 0.01$ ), \*\*\* ( $P < 0.001$ ) indicating  
751 that the mean values are significantly different and NS that they are not significantly different  
752 ( $P > 0.05$ ). SEM corresponds to standard error of the mean. The two-way ANOVA multiple  
753 comparisons was used to compare Northern blots bands intensities under different conditions.  
754

References

- 755  
756  
757 1. Yamaguchi Y, Park J-H, & Inouye M (2011) Toxin-Antitoxin Systems in Bacteria and  
758 Archaea. *Annual Review of Genetics* 45(1):61-79.
- 759 2. Goeders N & Van Melderen L (2014) Toxin-Antitoxin Systems as Multilevel  
760 Interaction Systems. *Toxins* 6(1):304-324.
- 761 3. Page R & Peti W (2016) Toxin-antitoxin systems in bacterial growth arrest and  
762 persistence. *Nat Chem Biol* 12(4):208-214.
- 763 4. Yang QE & Walsh TR (2017) Toxin-antitoxin systems and their role in disseminating  
764 and maintaining antimicrobial resistance. *FEMS Microbiology Reviews* 41(3):343-353.
- 765 5. Helaine S, *et al.* (2014) Internalization of *Salmonella* by Macrophages Induces  
766 Formation of Nonreplicating Persisters. *Science* 343(6167):204-208.
- 767 6. Wang X, *et al.* (2011) Antitoxin MqsA helps mediate the bacterial general stress  
768 response. *Nat Chem Biol* 7(6):359-366.
- 769 7. Berghoff BA & Wagner EGH (2017) RNA-based regulation in type I toxin-antitoxin  
770 systems and its implication for bacterial persistence. *Current Genetics*.
- 771 8. Harms A, Brodersen DE, Mitarai N, & Gerdes K (2018) Toxins, Targets, and  
772 Triggers: An Overview of Toxin-Antitoxin Biology. *Molecular Cell*.
- 773 9. Harms A, Maisonneuve E, & Gerdes K (2016) Mechanisms of bacterial persistence  
774 during stress and antibiotic exposure. *Science* 354(6318).
- 775 10. Goormaghtigh F, *et al.* (2018) Reassessing the Role of Type II Toxin-Antitoxin  
776 Systems in Formation of *Escherichia coli* Type II Persister Cells. *mBio* 9(3).
- 777 11. Shan Y, *et al.* (2017) ATP-Dependent Persister Formation in *Escherichia coli*. *mBio*  
778 8(1):e02267-02216.
- 779 12. Yamaoka Y (2010) Mechanisms of disease: *Helicobacter pylori* virulence factors. *Nat*  
780 *Rev Gastroenterol Hepatol* 7:629-641.

- 781 13. Amieva M & Peek Jr RM (2016) Pathobiology of *Helicobacter pylori*-Induced  
782 Gastric Cancer. *Gastroenterology* 150(1):64-78.
- 783 14. Loke MF, Ng CG, Vilashni Y, Lim J, & Ho B (2016) Understanding the dimorphic  
784 lifestyles of human gastric pathogen *Helicobacter pylori* using the SWATH-based  
785 proteomics approach. *Scientific Reports* 6:26784.
- 786 15. Reshetnyak VI & Reshetnyak TM (2017) Significance of dormant forms of  
787 *Helicobacter pylori* in ulcerogenesis. *World Journal of Gastroenterology*  
788 23(27):4867-4878.
- 789 16. Ayrapetyan M, Williams T, & Oliver JD (2018) The relationship between the viable  
790 but nonculturable state and antibiotic persister cells. *Journal of Bacteriology*.
- 791 17. Brantl S & Jahn N (2015) sRNAs in bacterial type I and type III toxin-antitoxin  
792 systems. *FEMS Microbiol Rev.* 39:413-427.
- 793 18. Masachis S & Darfeuille F (2018) Type I Toxin-Antitoxin Systems: Regulating Toxin  
794 Expression via Shine-Dalgarno Sequence Sequestration and Small RNA Binding.  
795 *Microbiology Spectrum* 6(4).
- 796 19. Sharma CM, *et al.* (2010) The primary transcriptome of the major human pathogen  
797 *Helicobacter pylori*. *Nature* 464:250-255.
- 798 20. Arnion H, *et al.* (2017) Mechanistic insights into type I toxin antitoxin systems in  
799 *Helicobacter pylori*: the importance of mRNA folding in controlling toxin expression.  
800 *Nucleic Acids Research* 45(8):4782-4795.
- 801 21. Boneca IG, *et al.* (2008) Development of inducible systems to engineer conditional  
802 mutants of essential genes of *Helicobacter pylori*. *Appl. Environ. Microbiol.*  
803 74(7):2095-2102.
- 804 22. Stingl K, Uhlemann E-M, Schmid R, Altendorf K, & Bakker EP (2002) Energetics of  
805 *Helicobacter pylori* and Its Implications for the Mechanism of Urease-Dependent  
806 Acid Tolerance at pH 1. *Journal of Bacteriology* 184(11):3053-3060.

- 807 23. Glauner B (1988) Separation and quantification of mucopeptides with high-  
808 performance liquid chromatography. *Anal Biochem.* 172:451-464.
- 809 24. Fischer F, *et al.* (2016) A novel essential ABC transporter and the NixA permease are  
810 the two sole nickel uptake systems of *Helicobacter pylori*. *PLoS Pathog* 12:e1006018.
- 811 25. Brantl S (2012) Bacterial type I toxin-antitoxin systems. *RNA Biology* 9(12):1488-  
812 1490.
- 813 26. Jahn N, Brantl S, & Strahl H (2015) Against the mainstream: the membrane -  
814 associated type I toxin BsrG from *Bacillus subtilis* interferes with cell envelope  
815 biosynthesis without increasing membrane permeability. *Molecular Microbiology*  
816 98(4):651-666.
- 817 27. Brielle R, Pinel-Marie M-L, & Felden B (2016) Linking bacterial type I toxins with  
818 their actions. *Current Opinion in Microbiology* 30:114-121.
- 819 28. Unoson C & Wagner EGH (2008) A small SOS - induced toxin is targeted against the  
820 inner membrane in *Escherichia coli*. *Molecular Microbiology* 70(1):258-270.
- 821 29. Sayed N, Nonin-Lecomte S, Réty S, & Felden B (2012) Functional and Structural  
822 Insights of a *Staphylococcus aureus* Apoptotic-like Membrane Peptide from a Toxin-  
823 Antitoxin Module. *The Journal of Biological Chemistry* 287(52):43454-43463.
- 824 30. Kusters JG, Gerrits MM, Van Strijp JA, & Vandenbroucke-Grauls CM (1997)  
825 Coccoid forms of *Helicobacter pylori* are the morphologic manifestation of cell death.  
826 *Infection and Immunity* 65(9):3672-3679.
- 827 31. Enroth H, *et al.* (1999) In Vitro Aging of *Helicobacter pylori*: Changes in Morphology,  
828 Intracellular Composition and Surface Properties. *Helicobacter* 4(1):7-16.
- 829 32. Costa K, *et al.* (1999) The Morphological Transition of *Helicobacter pylori* Cells from  
830 Spiral to Coccoid Is Preceded by a Substantial Modification of the Cell Wall. *J.*  
831 *Bacteriol* 181(12):3710-3715.

- 832 33. Yang DC, Blair KM, & Salama NR (2016) Staying in Shape: the Impact of Cell Shape  
833 on Bacterial Survival in Diverse Environments. *Microbiology and Molecular Biology*  
834 *Reviews : MMBR* 80(1):187-203.
- 835 34. Bonis M, Ecobichon C, Guadagnini S, Prévost M-C, & Boneca IG (2010) A M23B  
836 family metallopeptidase of *Helicobacter pylori* required for cell shape, pole formation  
837 and virulence. *Molecular Microbiology* 78(4):809-819.
- 838 35. Chaput C, *et al.* (2006) Role of AmiA in the Morphological Transition of  
839 *Helicobacter pylori* and in Immune Escape. *PLoS Pathogens* 2(9):e97.
- 840 36. Heller DM, Tavag M, & Hochschild A (2017) CbtA toxin of *Escherichia coli* inhibits  
841 cell division and cell elongation via direct and independent interactions with FtsZ and  
842 MreB. *PLoS genetics* 13(9):e1007007.
- 843 37. Zeng H, Guo G, Mao XH, De Tong W, & Zou QM (2008) Proteomic Insights into  
844 *Helicobacter pylori* Coccoid Forms Under Oxidative Stress. *Current Microbiology*  
845 57(4):281.
- 846 38. Müller P, *et al.* (2016) A multistress responsive type I toxin-antitoxin system:  
847 bsrE/SR5 from the *B. subtilis* chromosome. *RNA Biology* 13(5):511-523.
- 848 39. Cellini L (2014) *Helicobacter pylori*: A chameleon-like approach to life. *World*  
849 *Journal of Gastroenterology* 20(19):5575-5582.
- 850 40. Segal ED, Falkow S, & Tompkins LS (1996) *Helicobacter pylori* attachment to gastric  
851 cells induces cytoskeletal rearrangements and tyrosine phosphorylation of host cell  
852 proteins. *Proceedings of the National Academy of Sciences of the United States of*  
853 *America* 93(3):1259-1264.
- 854 41. Goldstein NS (2002) Chronic Inactive Gastritis and Coccoid *Helicobacter pylori* in  
855 Patients Treated for Gastroesophageal Reflux Disease or With H pylori Eradication  
856 Therapy. *American Journal of Clinical Pathology* 118(5):719-726.

- 857 42. Nagai S, *et al.* (2007) Role of Peyer's patches in the induction of *Helicobacter pylori*-  
858 induced gastritis. *Proceedings of the National Academy of Sciences of the United*  
859 *States of America* 104(21):8971-8976.
- 860 43. Cellini L, *et al.* (1994) Coccoid *Helicobacter pylori* not culturable *in vitro* reverts in  
861 mice. *Microbiology and Immunology* 38(11):843-850.
- 862 44. Butcher LD, den Hartog G, Ernst PB, & Crowe SE (2017) Oxidative Stress Resulting  
863 From *Helicobacter pylori* Infection Contributes to Gastric Carcinogenesis. *Cellular*  
864 *and Molecular Gastroenterology and Hepatology* 3(3):316-322.
- 865 45. Ayrapetyan M, Williams TC, & Oliver JD (2015) Bridging the gap between viable but  
866 non-culturable and antibiotic persistent bacteria. *Trends in microbiology* 23(1):7-13.
- 867 46. Rotem E, *et al.* (2010) Regulation of phenotypic variability by a threshold-based  
868 mechanism underlies bacterial persistence. *Proceedings of the National Academy of*  
869 *Sciences of the United States of America* 107(28):12541-12546.
- 870 47. Farnbacher M, *et al.* (2010) Sequencing, annotation and comparative genome analysis  
871 of the gerbil-adapted *Helicobacter pylori* strain B8. *BMC Genom.* 11:335.: doi:  
872 10.1186/1471-2164-1111-1335.
- 873 48. McClain MS, Shaffer CL, Israel DA, Peek RMJ, & Cover TL (2009) Genome  
874 sequence analysis of *Helicobacter pylori* strains associated with gastric ulceration and  
875 gastric cancer. *BMC Genom.* 10:3:doi: 10.1186/1471-2164-1110-1183.
- 876 49. Debowski AW, *et al.* (2012) Xer-cise in *Helicobacter pylori*: one-step transformation  
877 for the construction of markerless gene deletions. *Helicobacter* 17:435-443.
- 878 50. Kutter S, *et al.* (2008) Protein Subassemblies of the *Helicobacter pylori* Cag Type IV  
879 Secretion System Revealed by Localization and Interaction Studies. *Journal of*  
880 *Bacteriology* 190(6):2161-2171.
- 881 51. El Ghachi M, *et al.* (2011) Characterization of the elongasome core PBP2: MreC  
882 complex of *Helicobacter pylori*. *Molecular Microbiology* 82(1):68-86.

- 883 52. Muller C, *et al.* (2011) Hierarchical regulation of the NikR-mediated nickel response  
884 in *Helicobacter pylori*. *Nucleic Acids Res.* 39:7564-7575.
- 885 53. Corbinais C, Mathieu A, Kortulewski T, Radicella JP, & Marsin S (2016) Following  
886 transforming DNA in *Helicobacter pylori* from uptake to expression. *Mol Microbiol*  
887 101(6):1039-1053.
- 888 54. Miller JH (1992) *A short Course in Bacterial Genetics : A laboratory manual and*  
889 *handbook for Escherichia coli and related bacteria.* Cold Spring Harbor, N. Y (Cold  
890 Spring Harbor Laboratory).

891

Figure 1

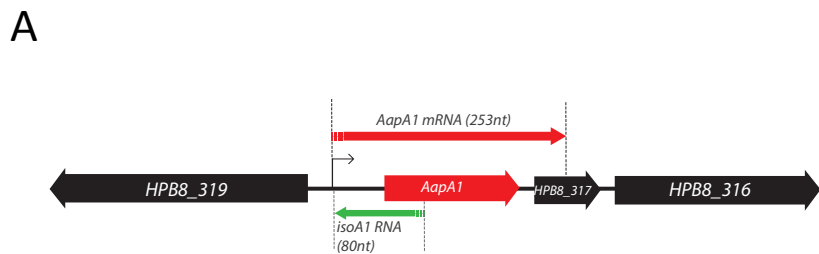

**B**

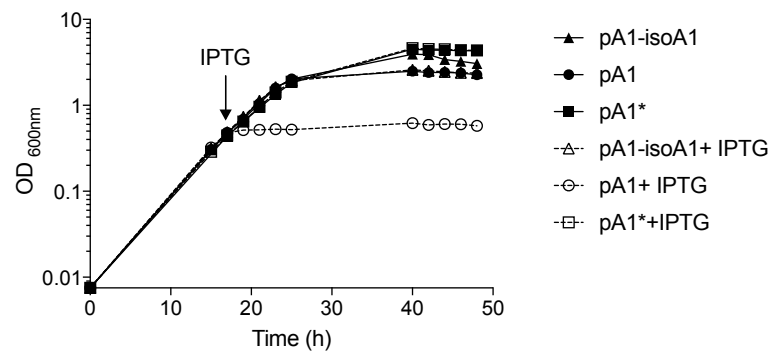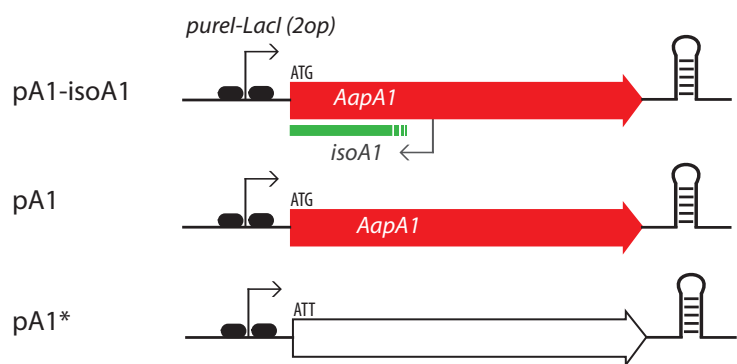

**C**

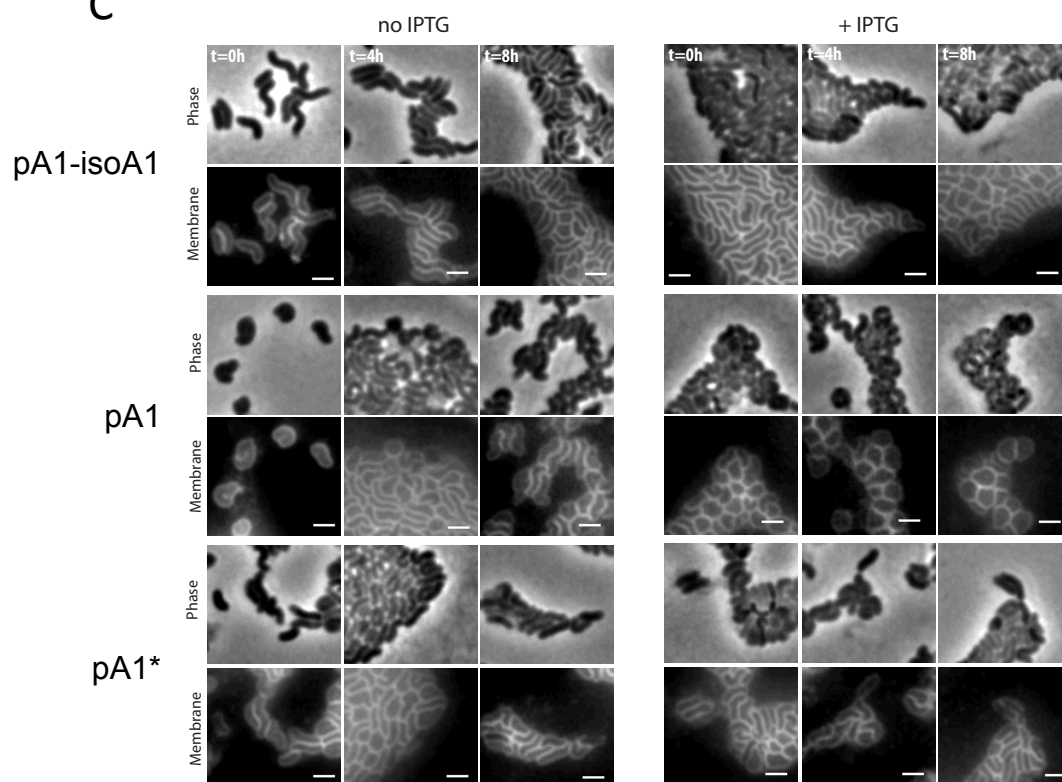



**Figure 2**

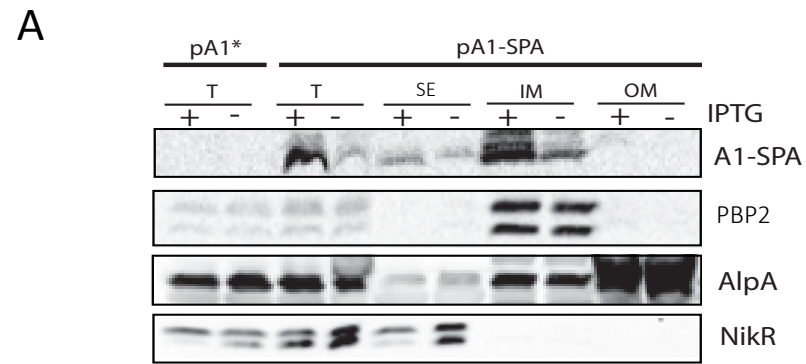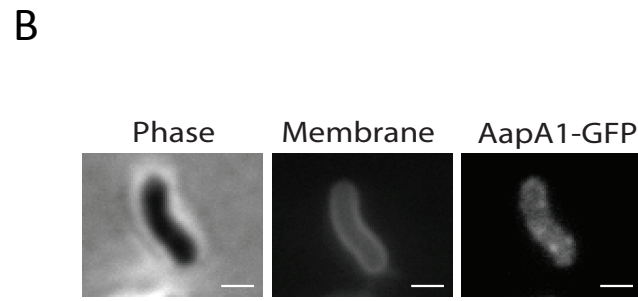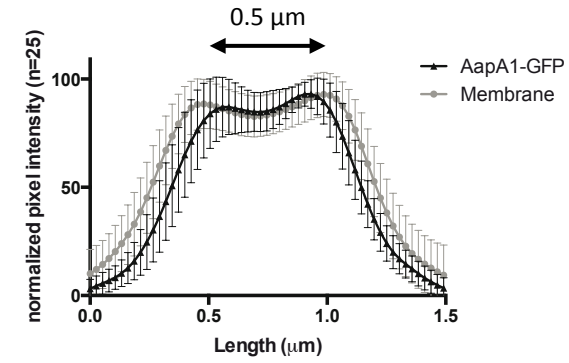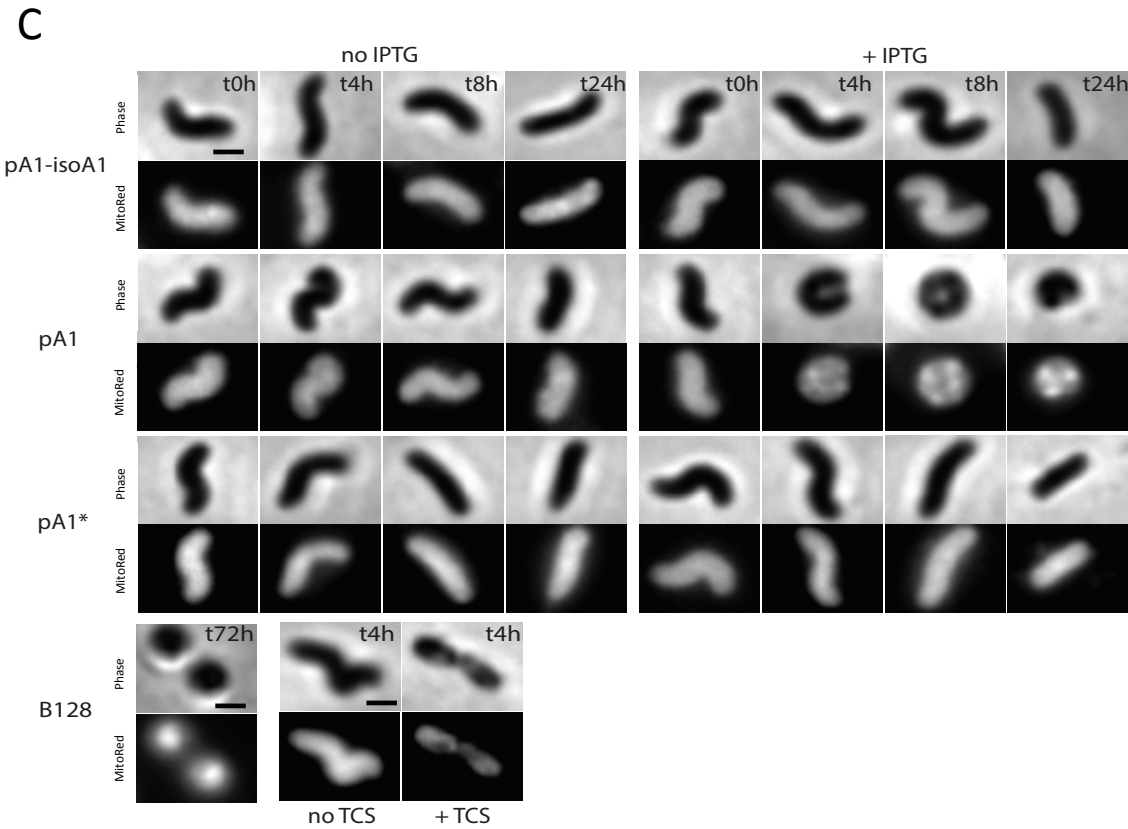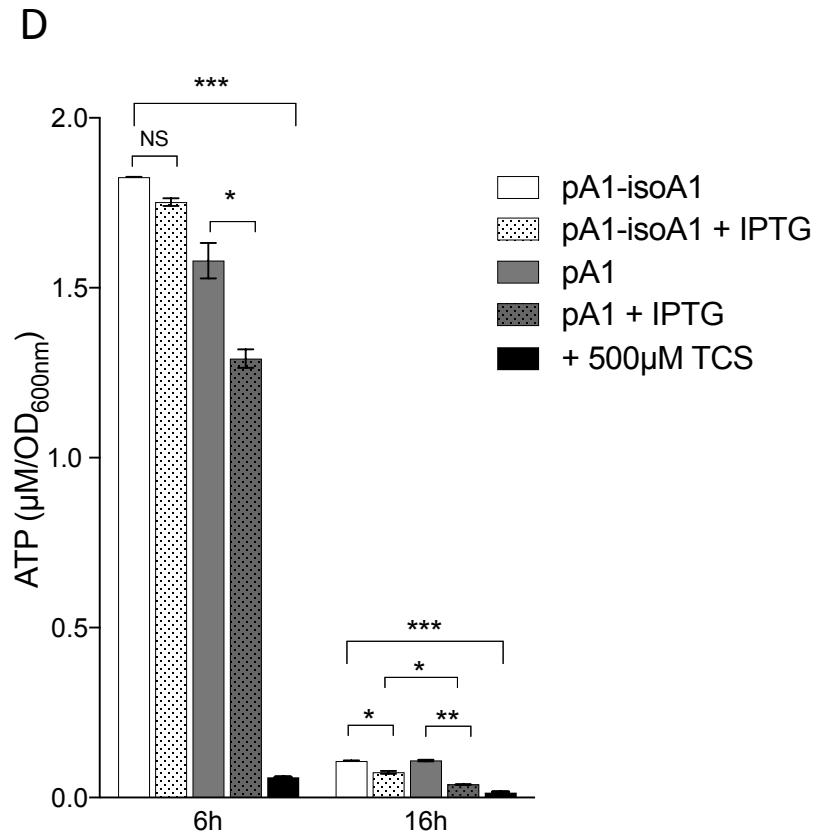

**Figure 3**

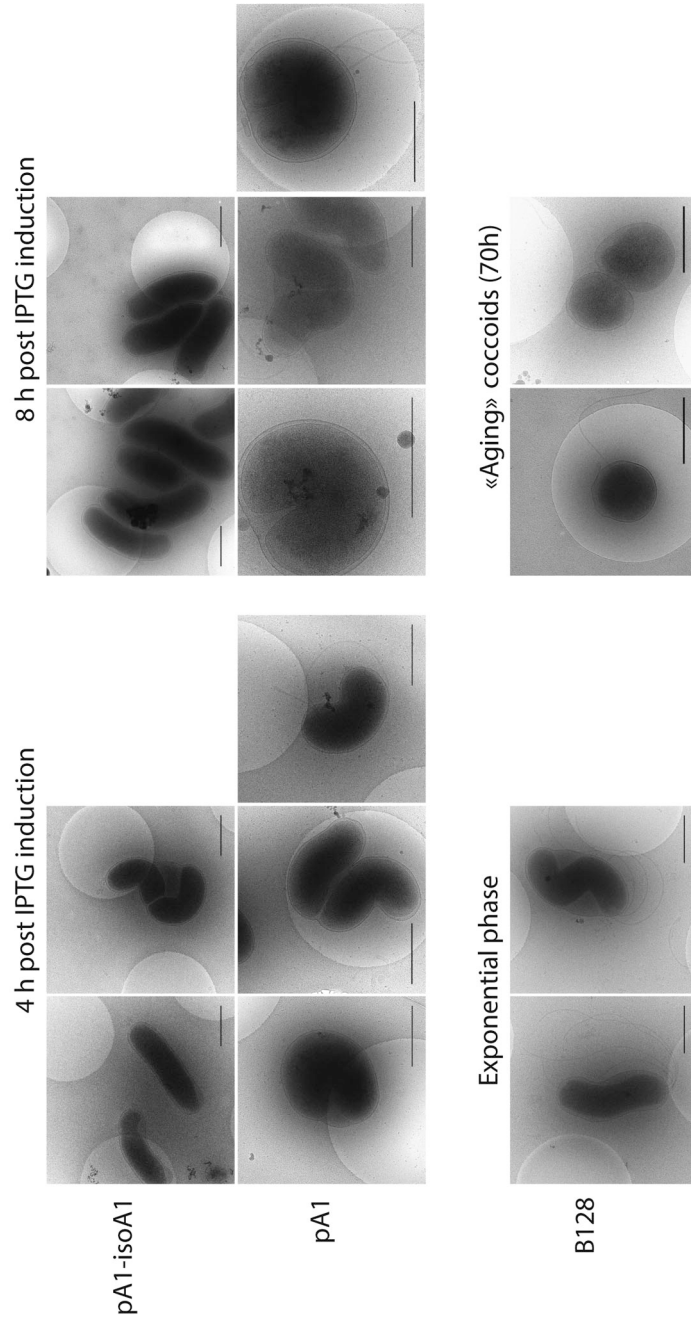

**Figure 4**

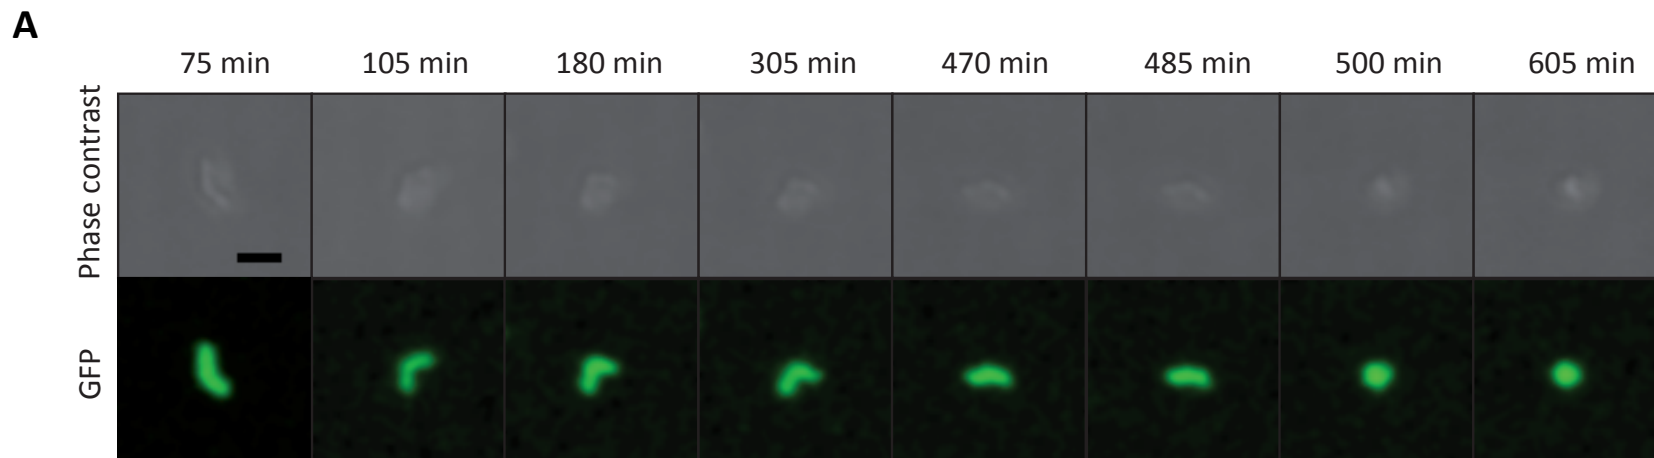

**B**

|                 | Time before «bending» phenotype (min) | Time before «pseudo-cocoid» phenotype (min) | Time before «donut» phenotype (min) | Maximum length before morphological change (μm) |
|-----------------|---------------------------------------|---------------------------------------------|-------------------------------------|-------------------------------------------------|
|                 |                                       |                                             |                                     |                                                 |
| Number of cells | 49                                    | 37                                          | 21                                  | 63                                              |
| Median          | 180                                   | 280                                         | 420                                 | 3.58                                            |
| Mean ± SEM      | 185 ± 8.0                             | 277 ± 16                                    | 420 ± 25.2                          | 3.48 ± 0.08                                     |

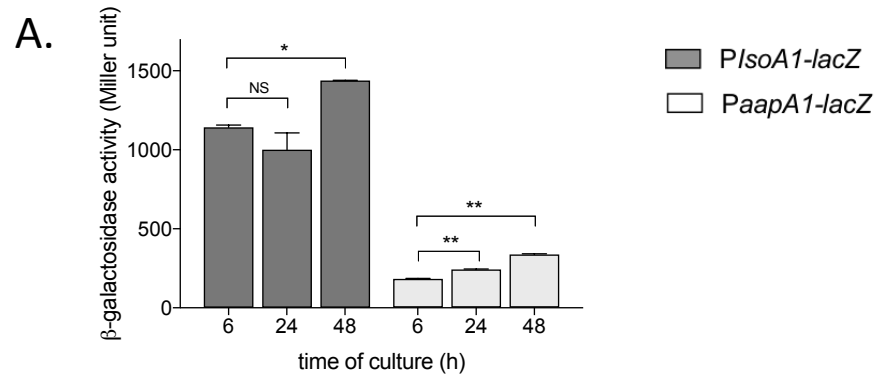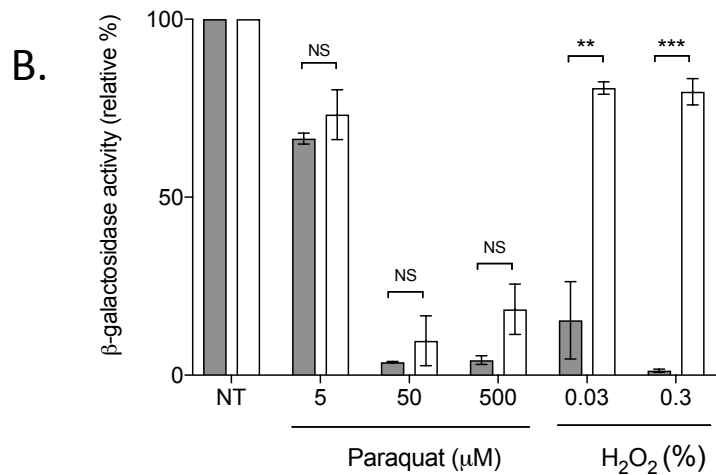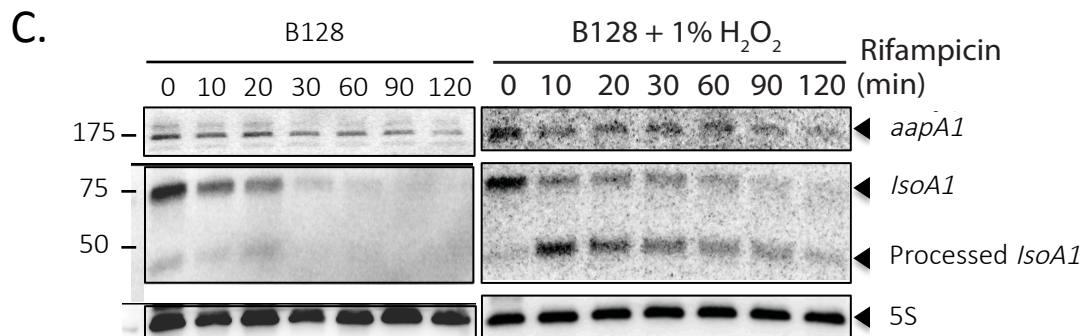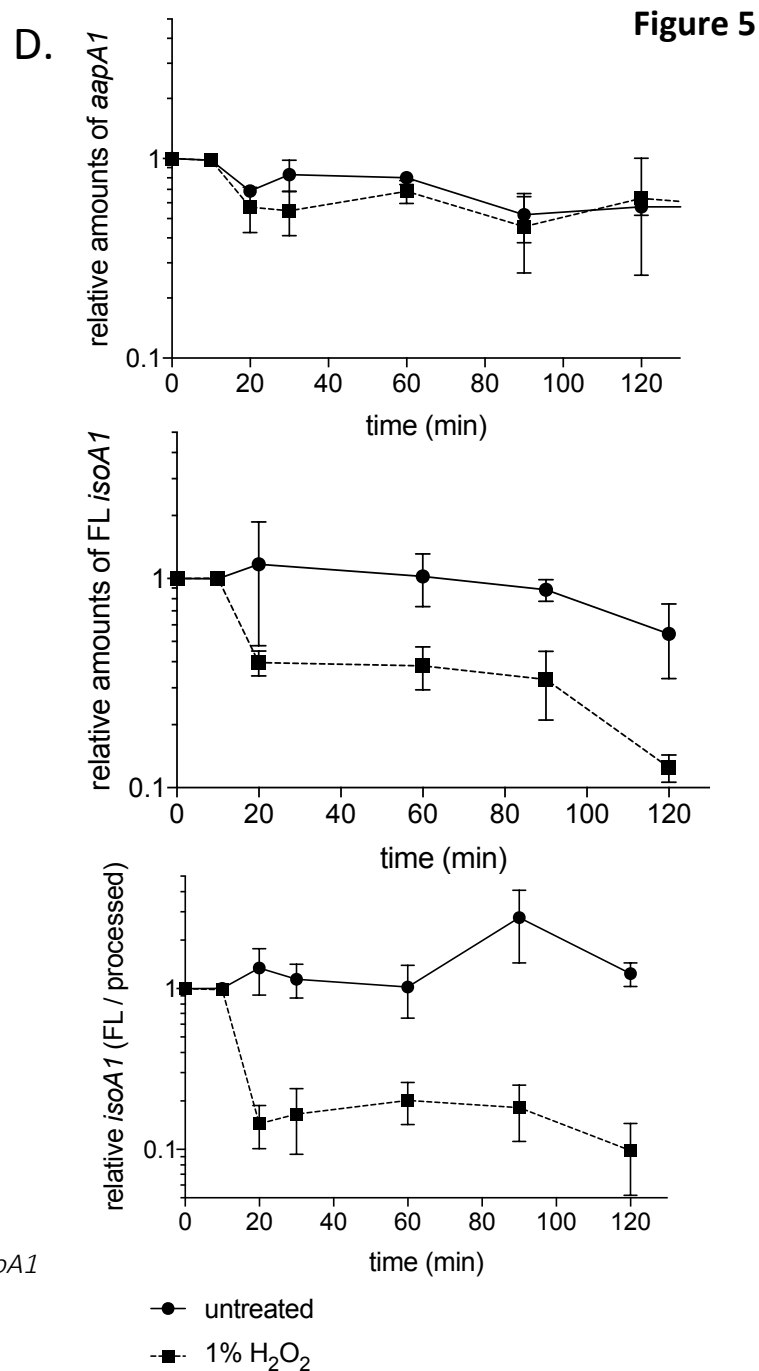

Source: https://www.biorxiv.org/content/10.1101/585380v1.full.pdf
